# Supplementary material for: Terephthalate and trimesate metal–organic frameworks of Mn, Co, and Ni: exploring photostability by spectroscopy
Source: Royal Society of Chemistry journal article supplement (doi:10.1039/d1ra00181g), 2021-01-01
Supplement: d1ra00181g1.pdf [file d1ra00181g1.pdf]

**Terephthalate and trimesate metal-organic frameworks of Mn, Co, and Ni: Exploring  
photostability by spectroscopy**

Nishesh Kumar Gupta<sup>a,b</sup>, Jiyeol Bae<sup>b</sup>, Suho Kim<sup>a,b</sup>, Kwang Soo Kim<sup>a,b\*</sup>

*a. University of Science and Technology (UST), Daejeon, Republic of Korea*

*b. Department of Land, Water, and Environment Research, Korea Institute of Civil  
Engineering and Building Technology (KICT), Goyang, Republic of Korea*

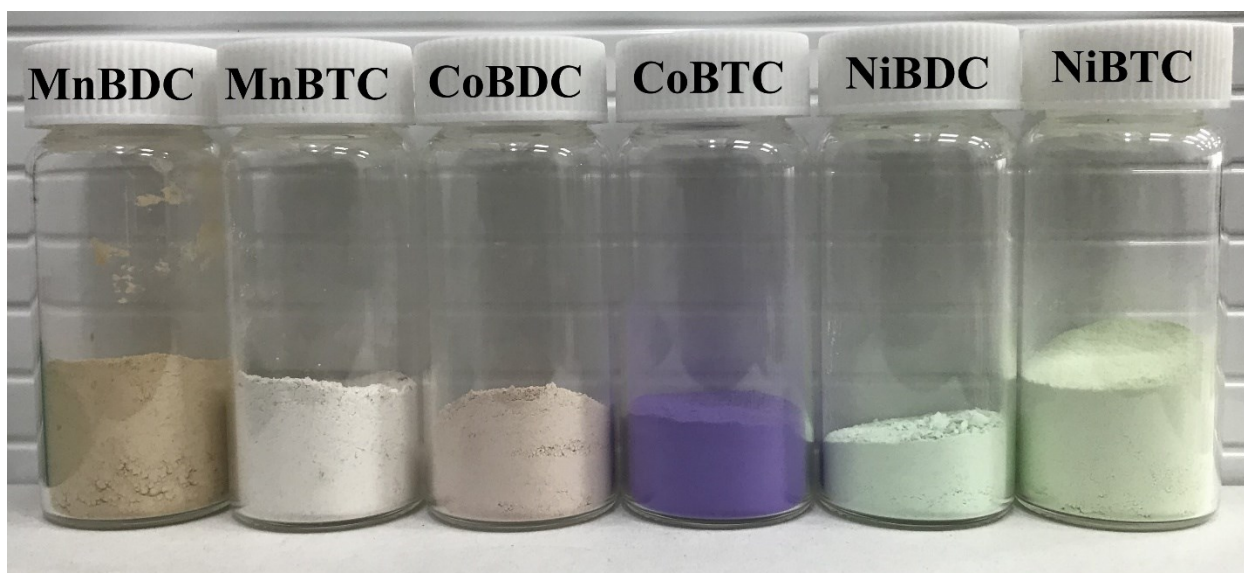

**Supplementary figure 1.** Photograph of synthesized transition MOFs.

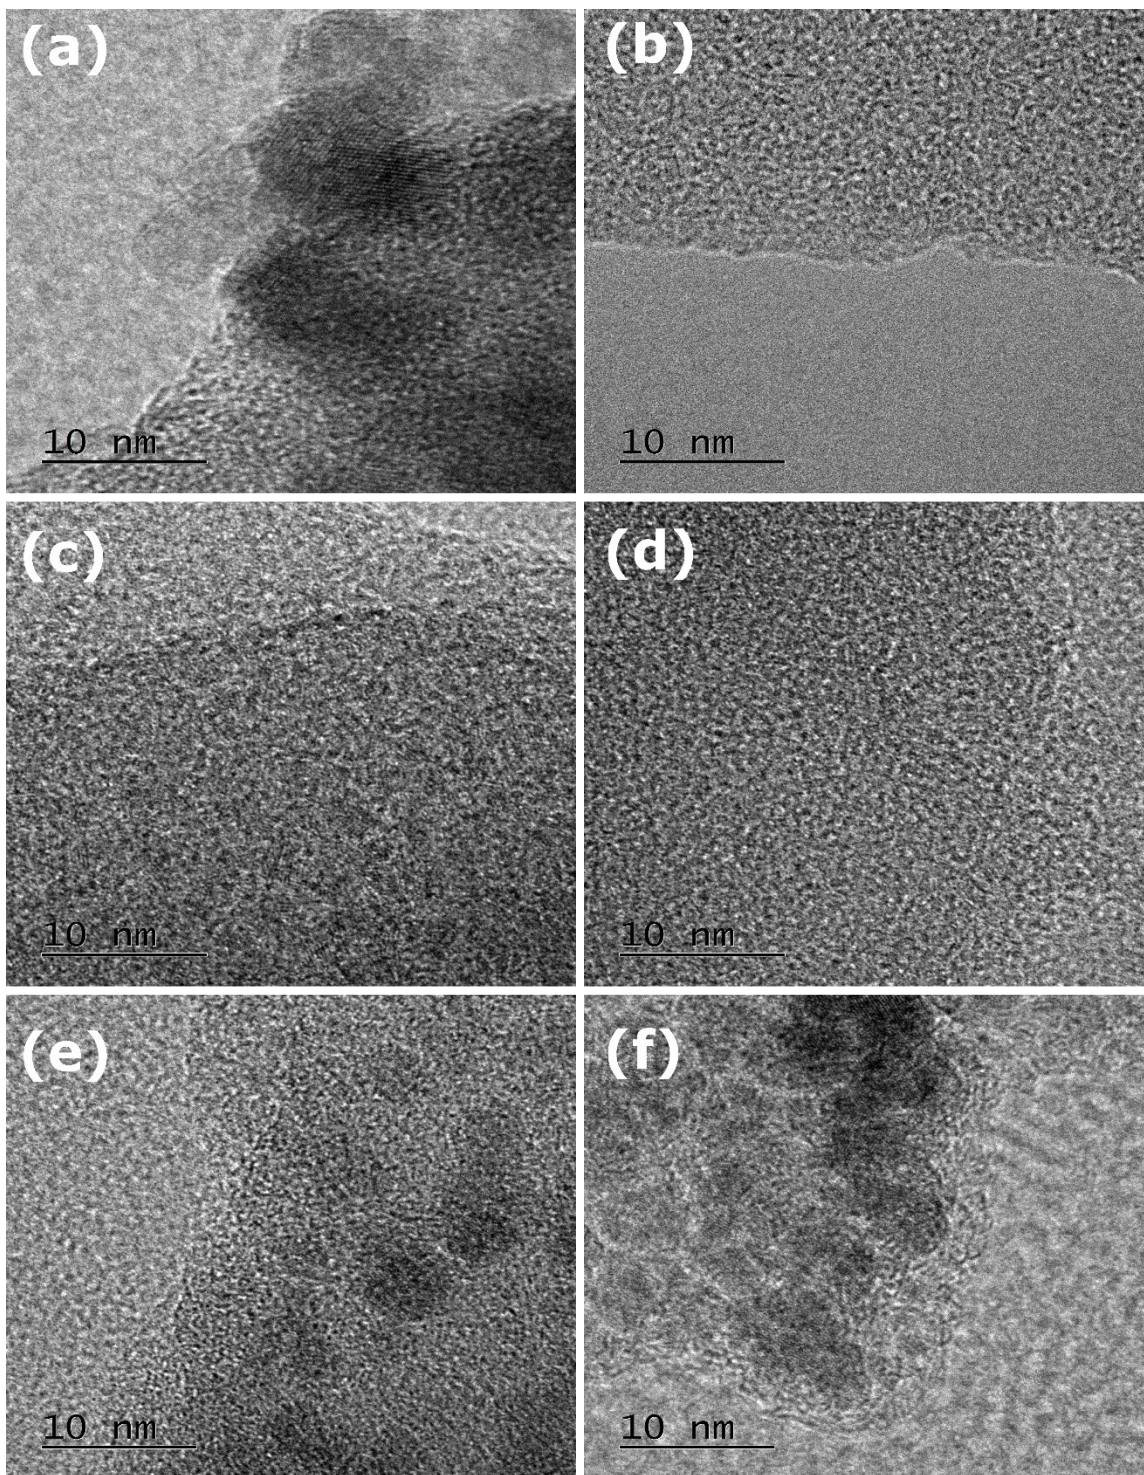

**Supplementary figure 2.** TEM images of (a) MnBDC; (b) MnBTC; (c) CoBDC; (d) CoBTC; (e) NiBDC; (f) NiBTC at 10 nm resolution.

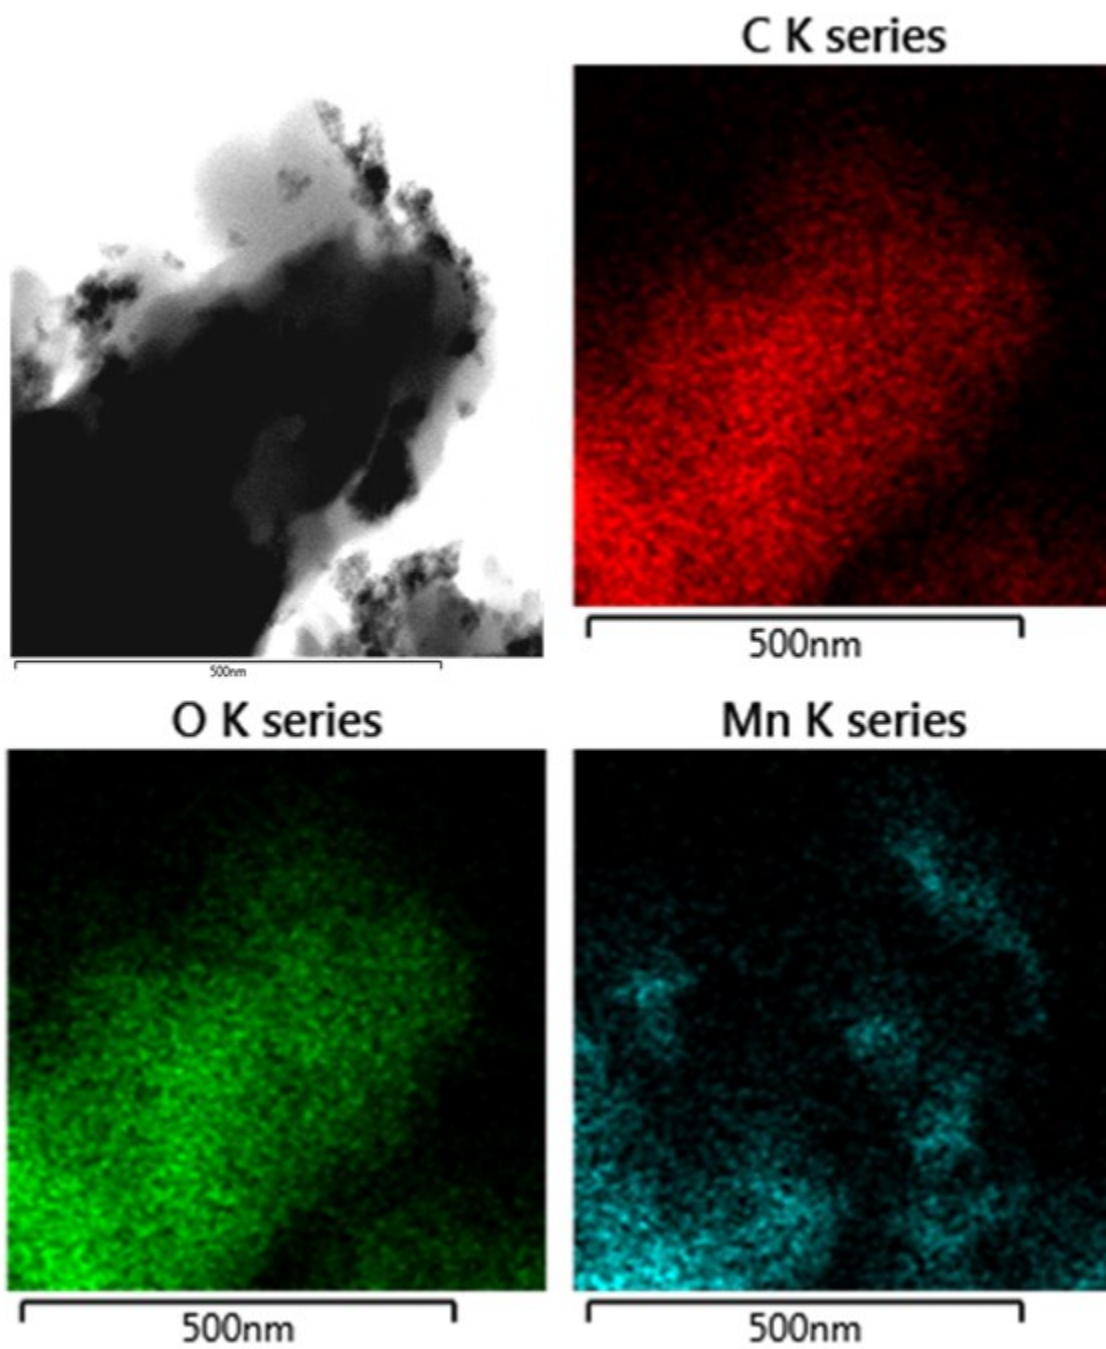

**Supplementary figure 3a.** 2D elemental mapping of MnBDC.

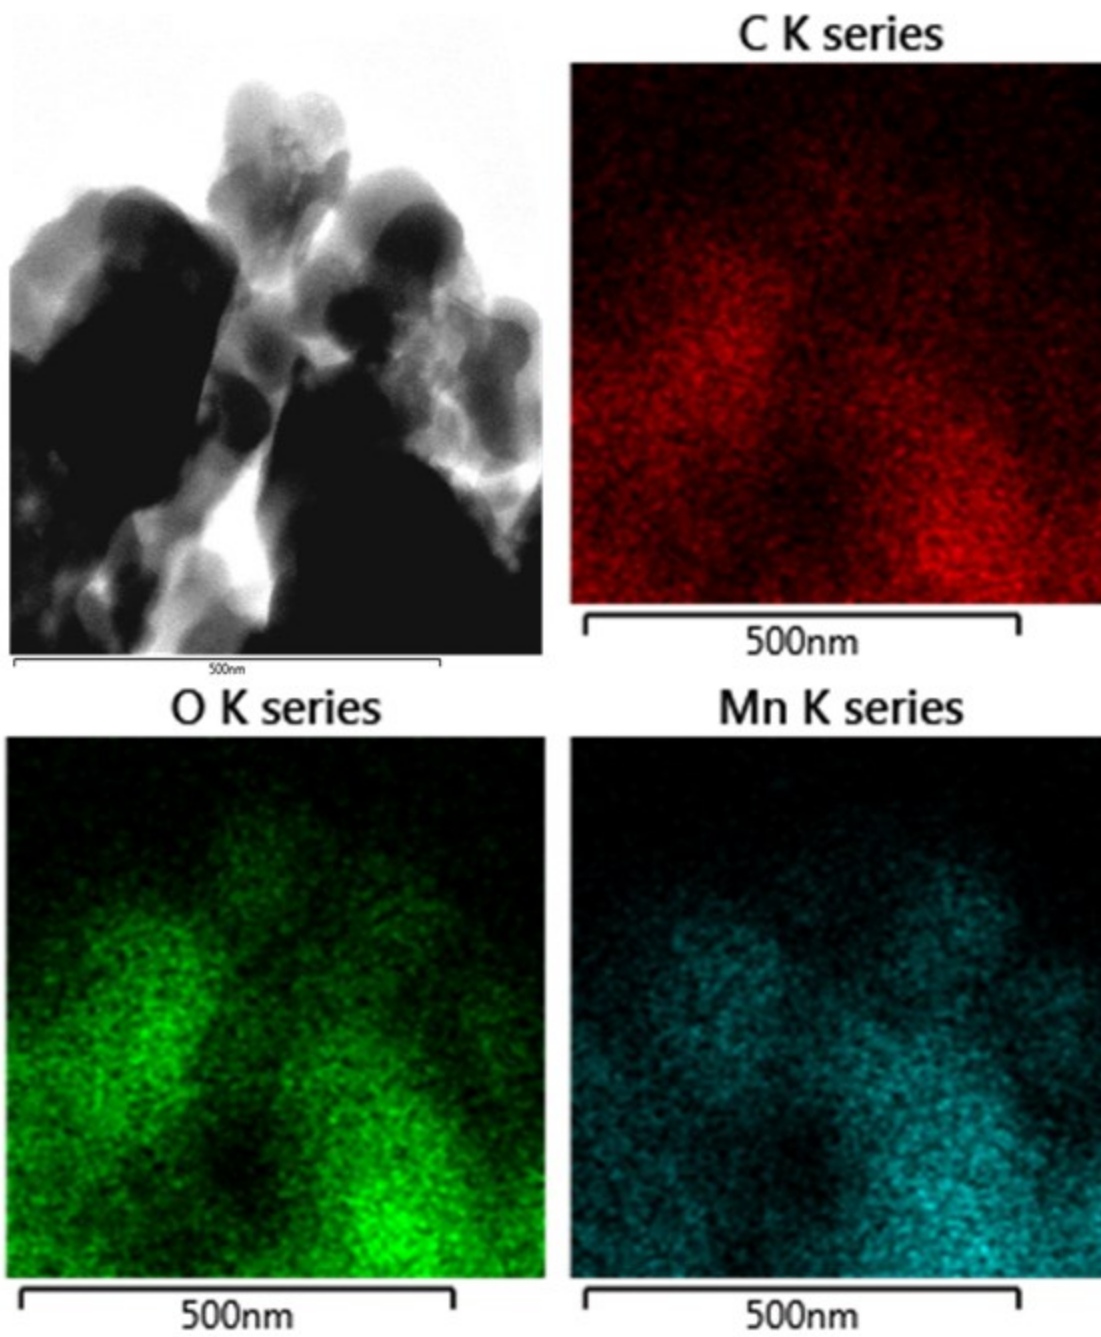

**Supplementary figure 3b.** 2D elemental mapping of MnBTC.

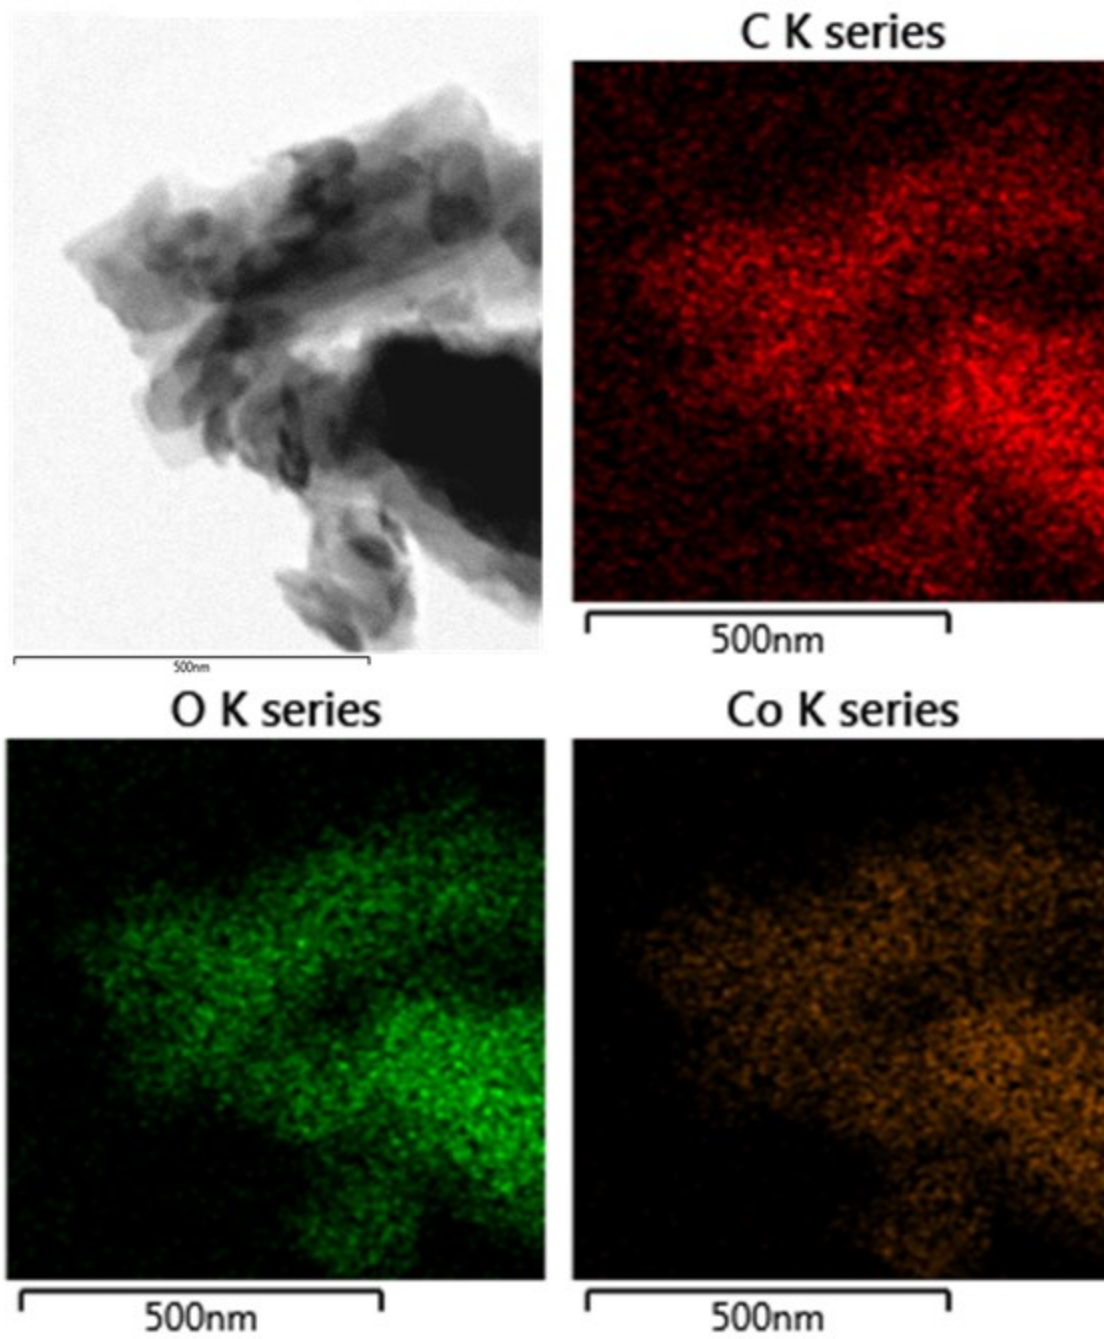

Supplementary figure 3c. 2D elemental mapping of CoBDC.

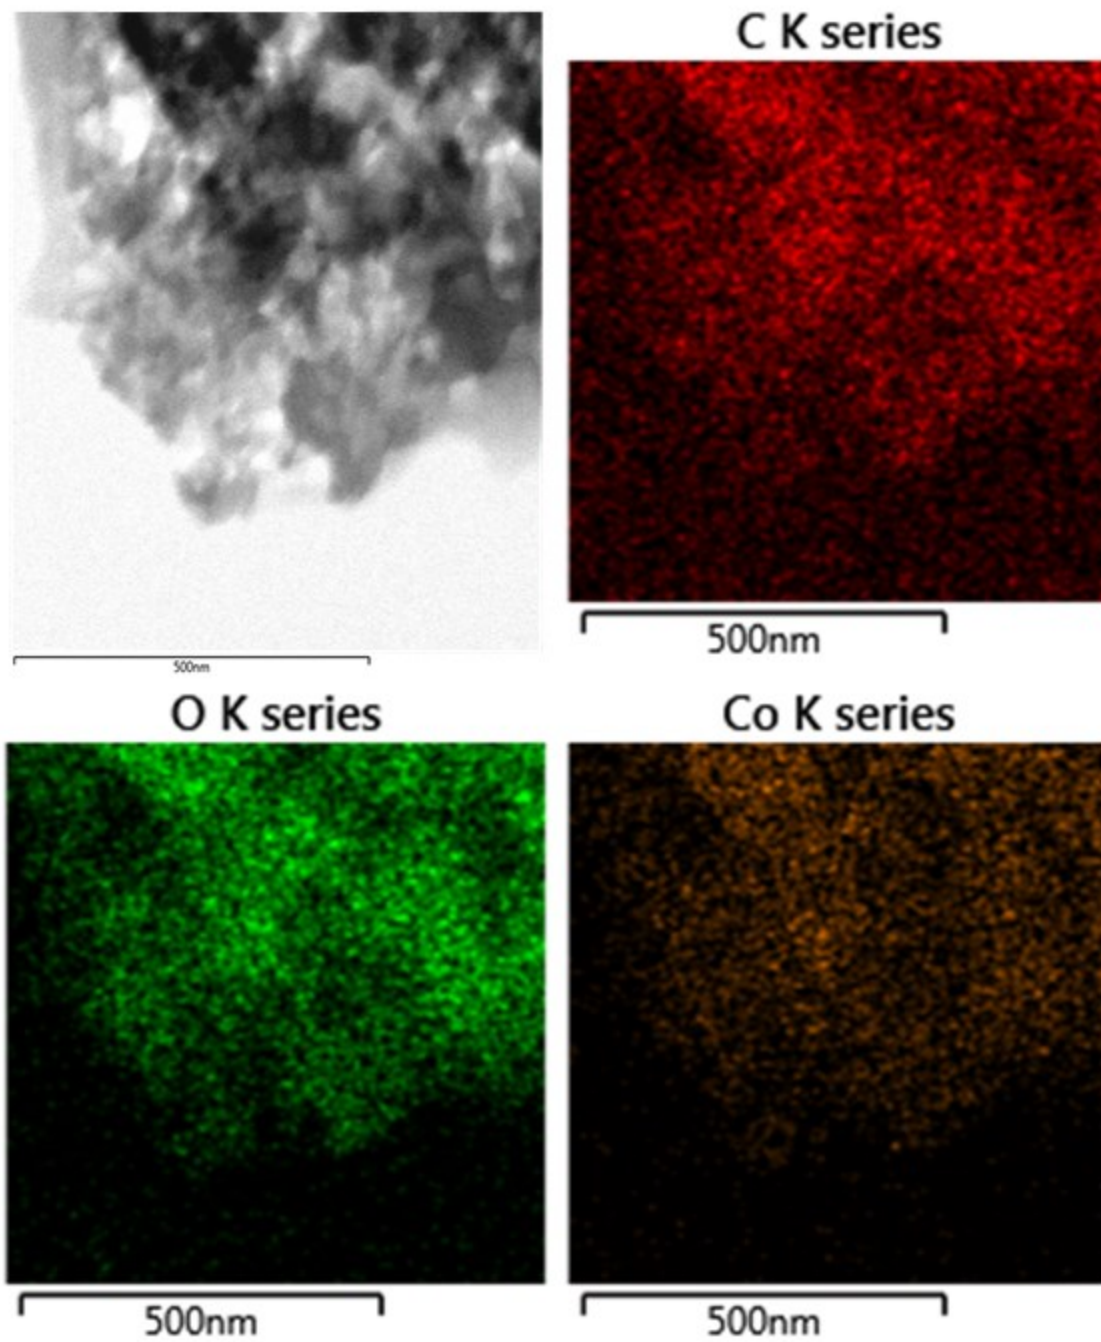

**Supplementary figure 3d.** 2D elemental mapping of CoBTC.

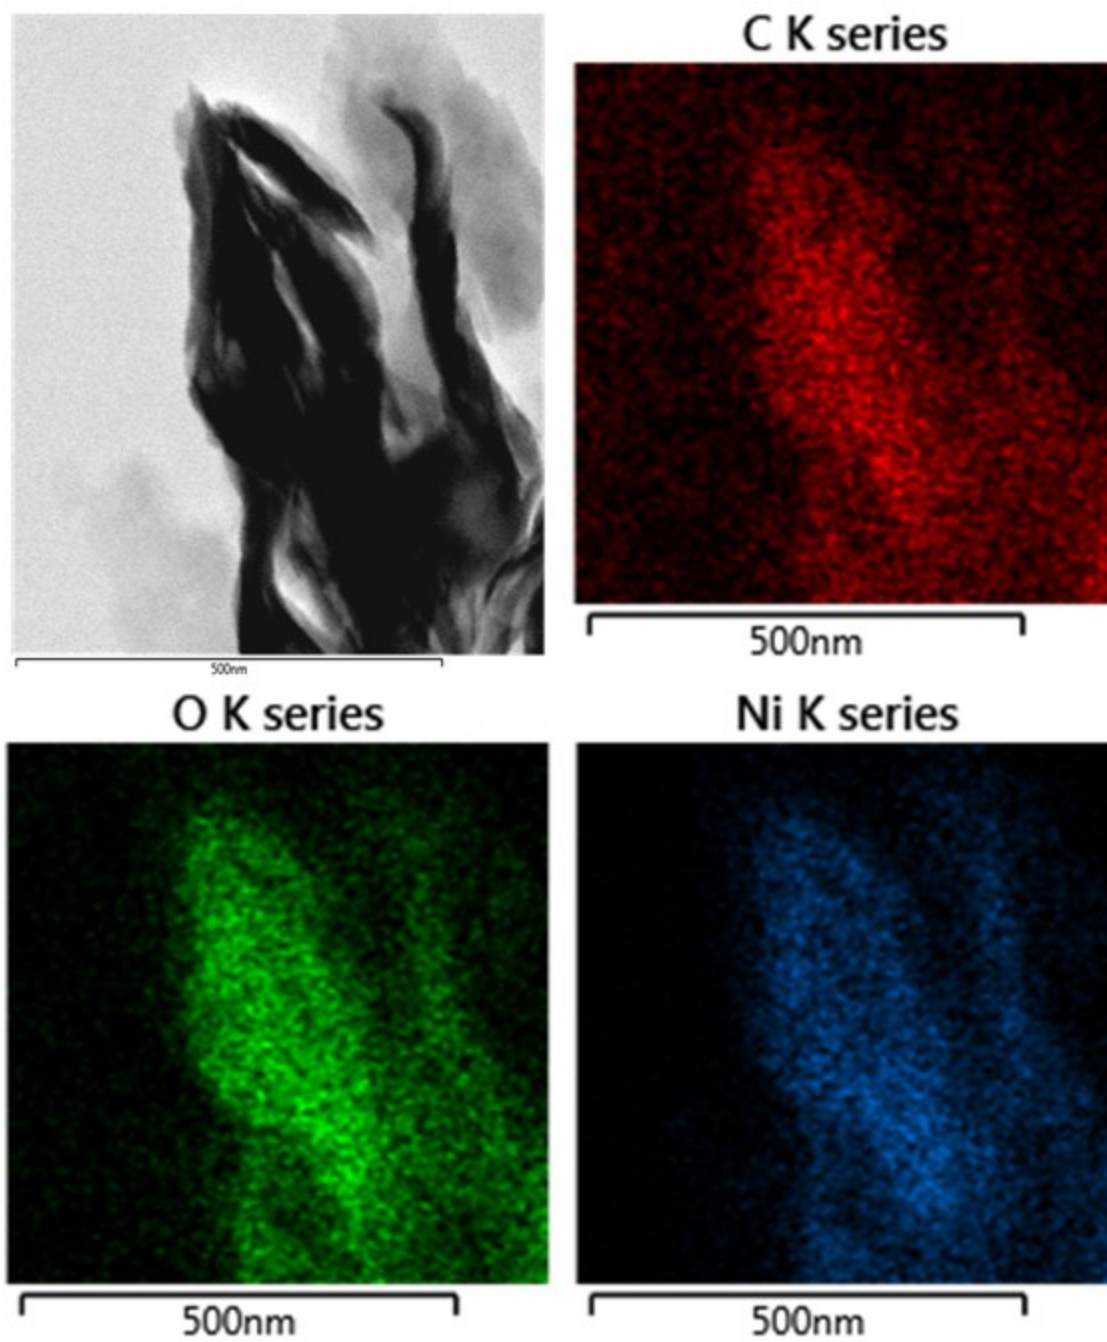

**Supplementary figure 3e.** 2D elemental mapping of NiBDC.

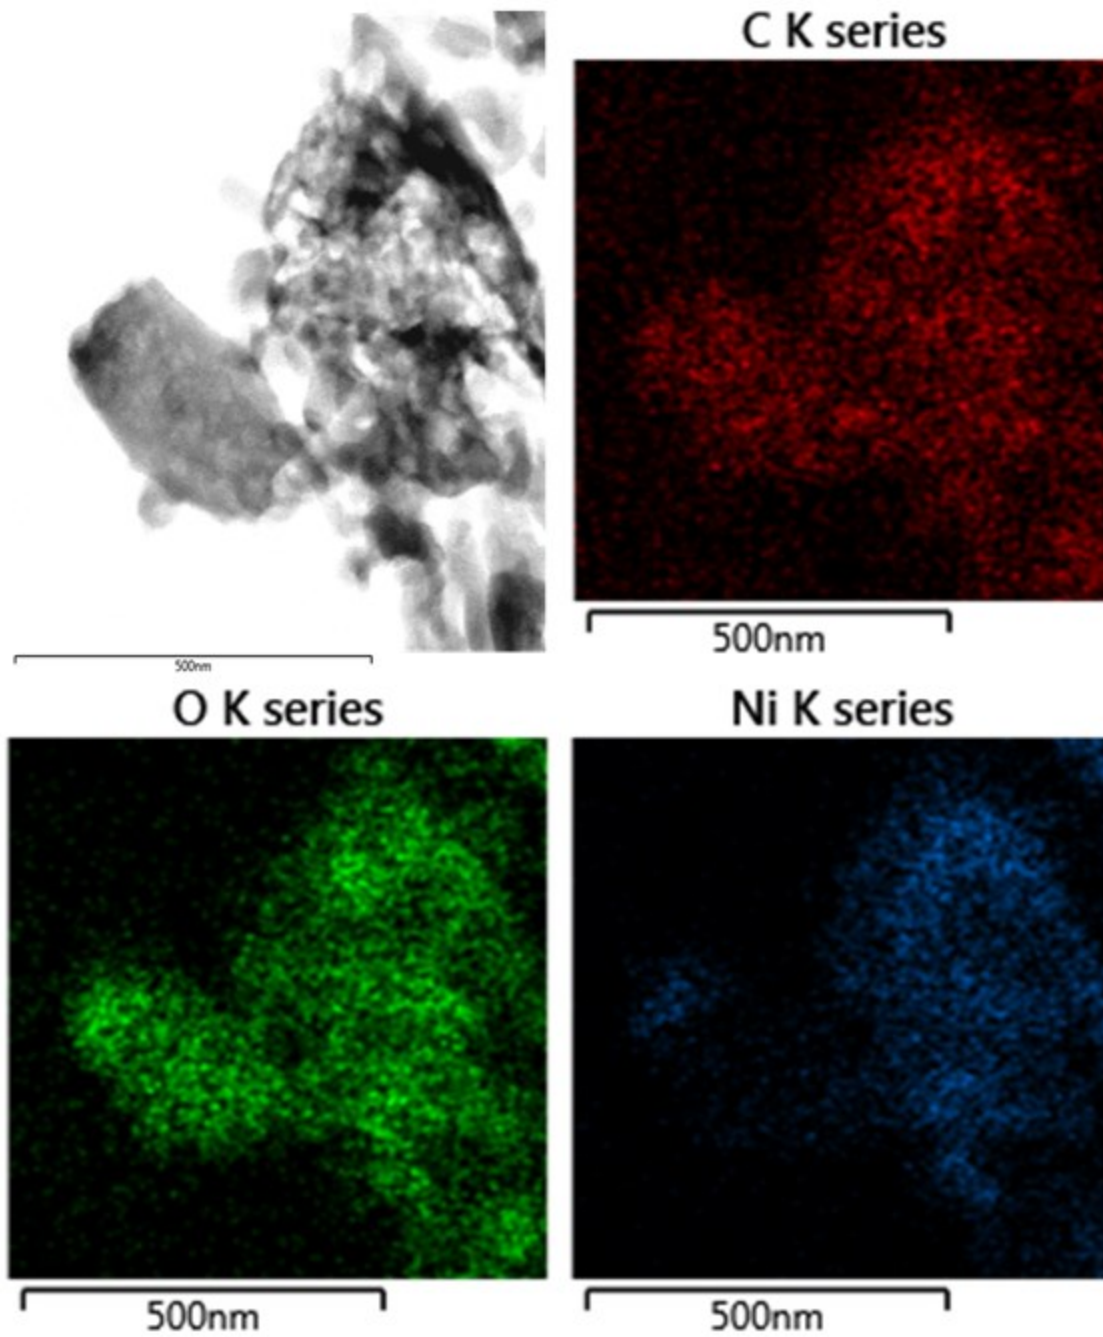

**Supplementary figure 3f.** 2D elemental mapping of NiBTC.



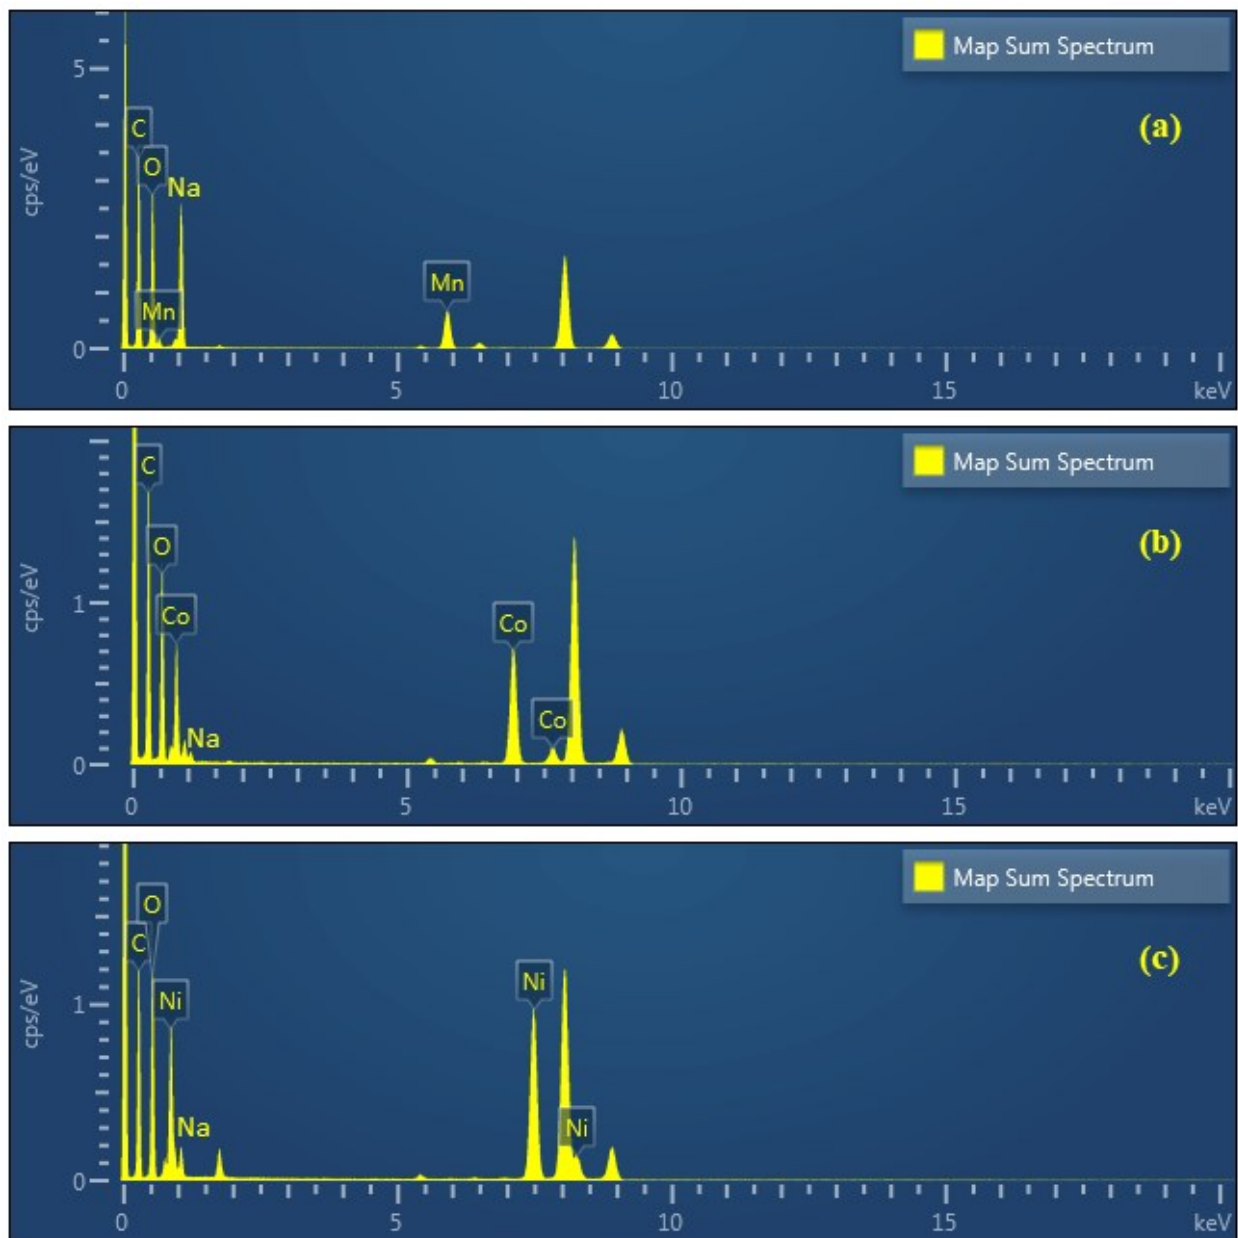

**Supplementary Figure 4.** TEM-EDS analysis of (a) MnBDC; (b) CoBDC; (c) NiBDC.

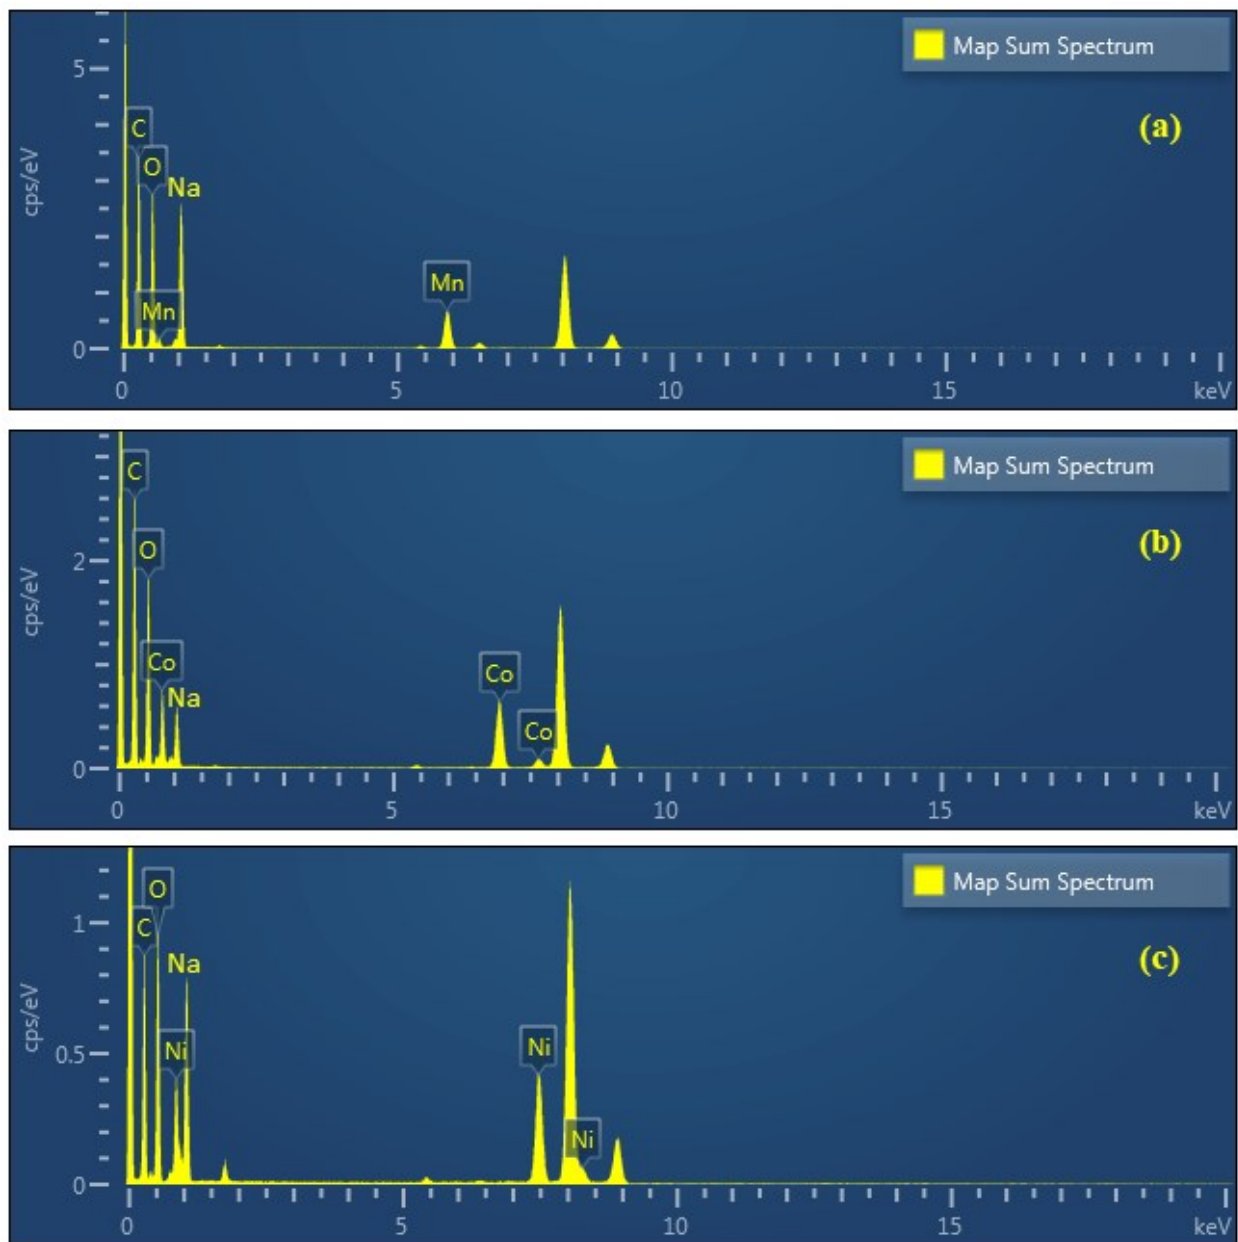

**Supplementary Figure 5.** TEM-EDS analysis of (a) MnBTC; (b) CoBTC; (c) NiBTC.

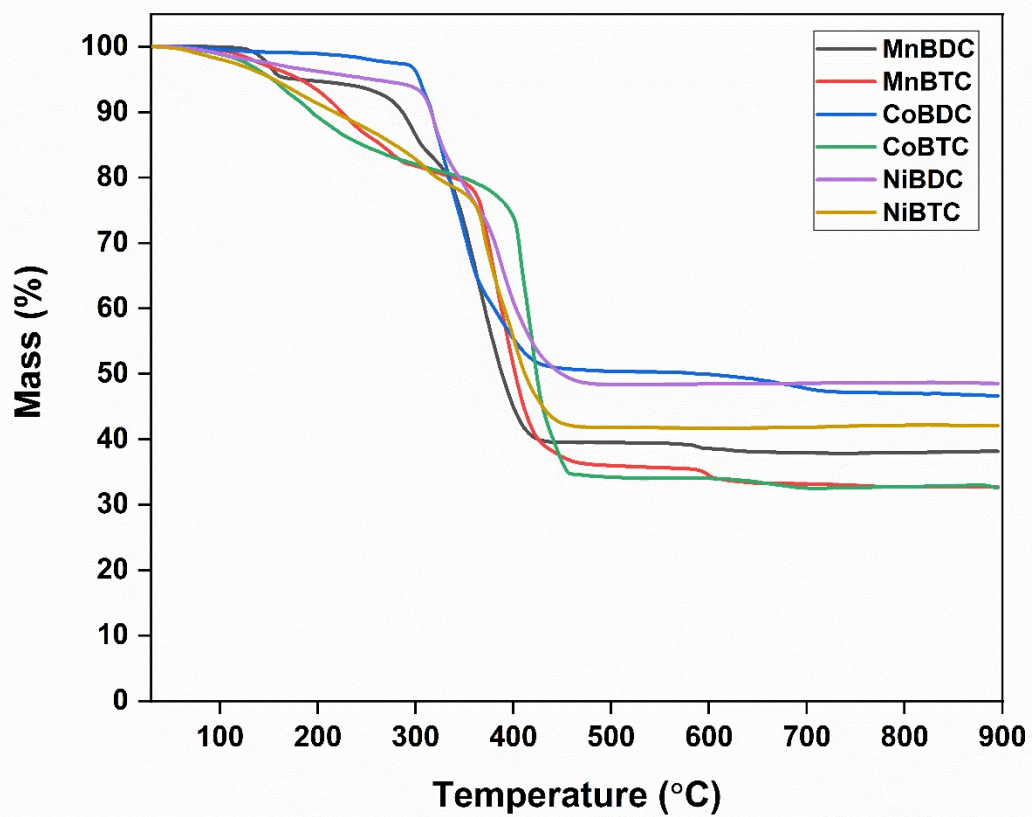

Supplementary Figure 6. TGA profiles of MOFs.

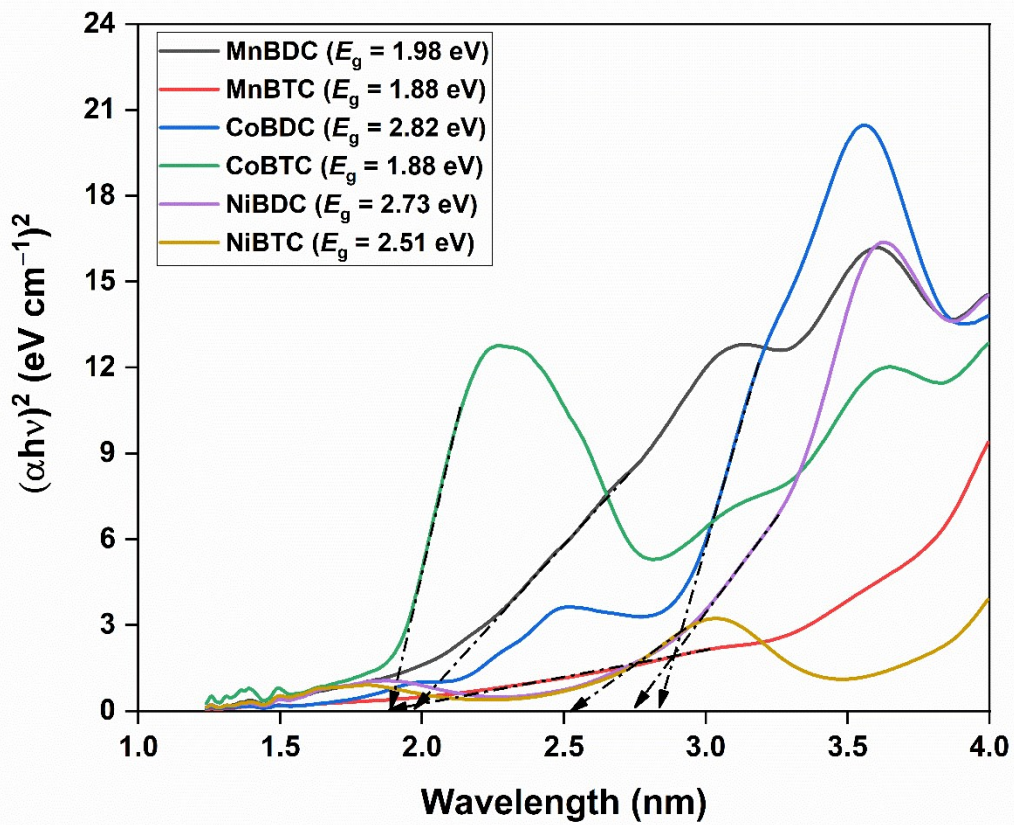

Supplementary Figure 7. Tauc plots for MOFs.

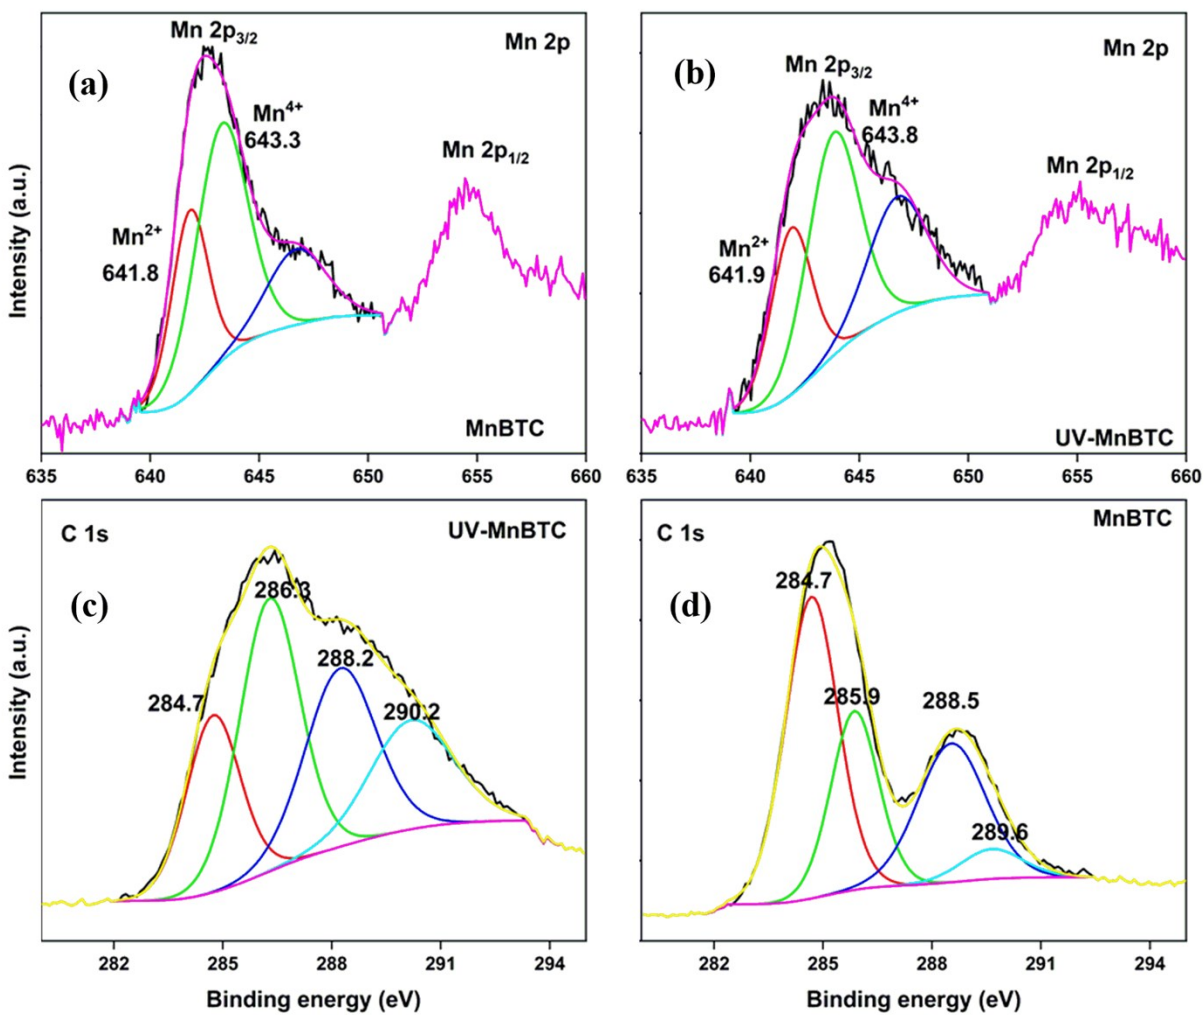

**Supplementary Figure 8.** HRXPS Mn 2p spectra of (a) MnBTC; (b) UV-MnBTC; HRXPS C 1s spectra of (c) MnBTC; (d) UV-MnBTC

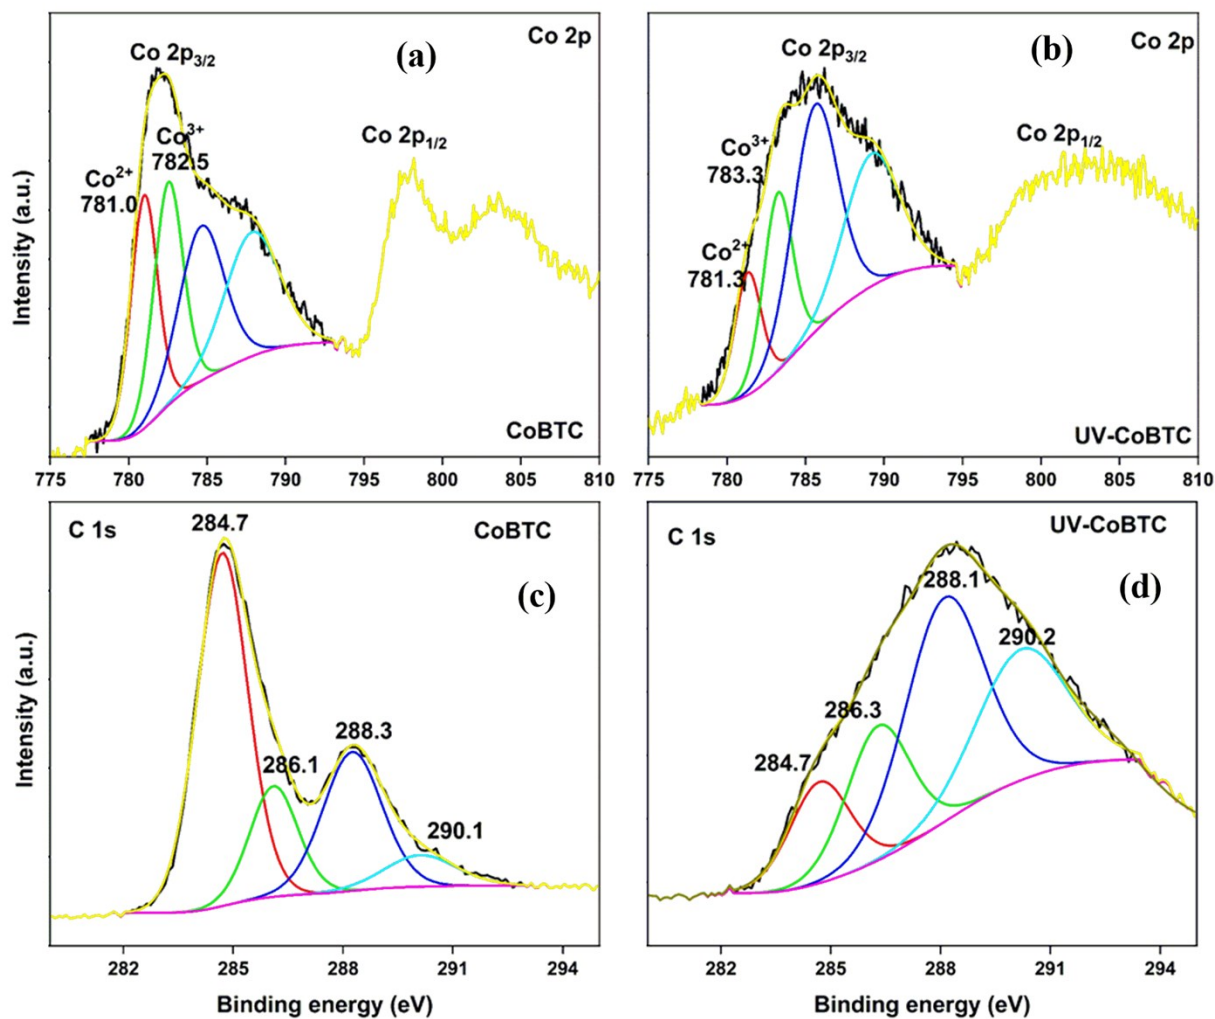

**Supplementary Figure 9.** HRXPS Co 2p spectra of (a) CoBTC; (b) UV-CoBTC; HRXPS C 1s spectra of (c) CoBTC; (d) UV-CoBTC

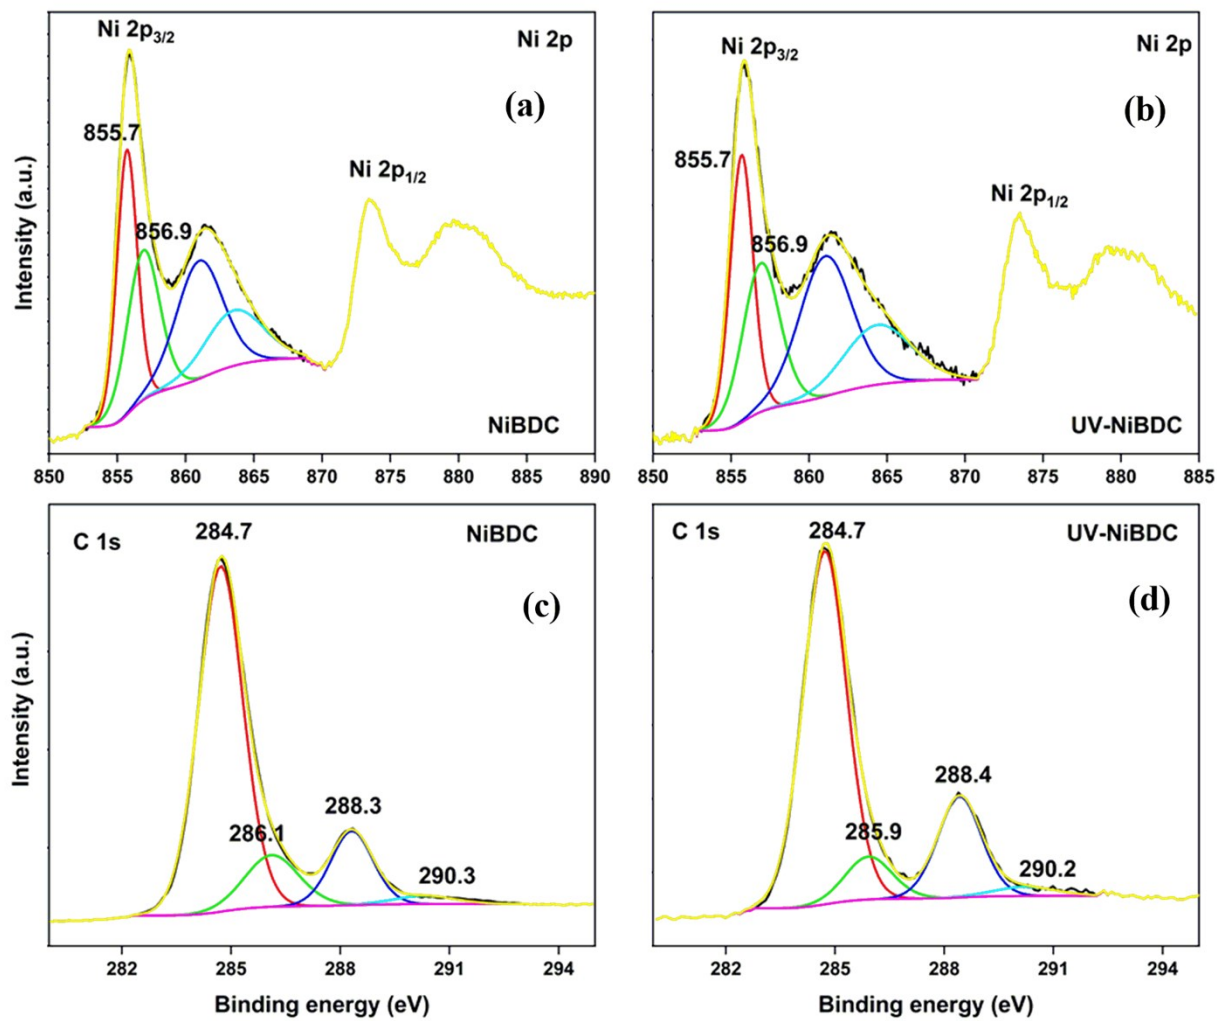

**Supplementary Figure 10.** HRXPS Ni 2p spectra of (a) NiBDC; (b) UV-NiBDC; HRXPS C 1s spectra of (c) NiBDC; (d) UV-NiBDC

**Supplementary Table 1.** Curve fitting parameters from Mn 2p spectra of Mn-MOFs

| Samples         | Assignment                                 | $E_B$ (eV) | FWHM (eV) | At. % |
|-----------------|--------------------------------------------|------------|-----------|-------|
| <b>MnBDC</b>    | <b>Mn2p<sub>3/2</sub></b> Mn <sup>2+</sup> | 641.6      | 2.2       | 22.5  |
|                 | <b>Mn2p<sub>3/2</sub></b> Mn <sup>4+</sup> | 643.6      | 2.8       | 77.5  |
|                 | <b>Mn2p<sub>3/2</sub></b> Satellite        | 646.0      | 3.2       | -     |
| <b>UV-MnBDC</b> | <b>Mn2p<sub>3/2</sub></b> Mn <sup>2+</sup> | 641.0      | 1.8       | 30.4  |
|                 | <b>Mn2p<sub>3/2</sub></b> Mn <sup>4+</sup> | 642.5      | 2.8       | 69.6  |
|                 | <b>Mn2p<sub>3/2</sub></b> Satellite        | 645.9      | 3.2       | -     |
| <b>MnBTC</b>    | <b>Mn2p<sub>3/2</sub></b> Mn <sup>2+</sup> | 641.8      | 2.0       | 35.4  |
|                 | <b>Mn2p<sub>3/2</sub></b> Mn <sup>4+</sup> | 643.3      | 2.8       | 64.6  |
|                 | <b>Mn2p<sub>3/2</sub></b> Satellite        | 646.7      | 3.2       | -     |
| <b>UV-MnBTC</b> | <b>Mn2p<sub>3/2</sub></b> Mn <sup>2+</sup> | 641.9      | 2.2       | 37.0  |
|                 | <b>Mn2p<sub>3/2</sub></b> Mn <sup>4+</sup> | 643.8      | 2.8       | 63.0  |
|                 | <b>Mn2p<sub>3/2</sub></b> Satellite        | 646.7      | 3.2       | -     |

**Supplementary Table 2.** Curve fitting parameters from C 1s spectra of Mn-MOFs

| Samples         | Assignment         | $E_B$ (eV) | FWHM (eV) | At. % |
|-----------------|--------------------|------------|-----------|-------|
| <b>MnBDC</b>    | <b>C1s</b> C=C,C-H | 284.7      | 1.9       | 11.6  |
|                 | <b>C1s</b> C-O     | 286.4      | 2.4       | 47.2  |
|                 | <b>C1s</b> -COOMn  | 288.2      | 2.2       | 31.3  |
|                 | <b>C1s</b> -COONa  | 290.2      | 2.4       | 10.0  |
| <b>UV-MnBDC</b> | <b>C1s</b> C=C,C-H | 284.7      | 1.5       | 48.4  |



|                 |                               |       |     |      |
|-----------------|-------------------------------|-------|-----|------|
|                 | <b>C1s</b> <sub>C-O</sub>     | 286.1 | 1.7 | 27.3 |
|                 | <b>C1s</b> <sub>-COOMn</sub>  | 288.4 | 1.9 | 17.5 |
|                 | <b>C1s</b> <sub>-COONa</sub>  | 290.2 | 2.2 | 6.8  |
| <b>MnBTC</b>    | <b>C1s</b> <sub>C=C,C-H</sub> | 284.7 | 1.7 | 44.4 |
|                 | <b>C1s</b> <sub>C-O</sub>     | 285.9 | 1.5 | 23.9 |
|                 | <b>C1s</b> <sub>-COOMn</sub>  | 288.5 | 2.2 | 26.4 |
|                 | <b>C1s</b> <sub>-COONa</sub>  | 289.6 | 2.0 | 5.2  |
| <b>UV-MnBTC</b> | <b>C1s</b> <sub>C=C,C-H</sub> | 284.7 | 1.7 | 20.0 |
|                 | <b>C1s</b> <sub>C-O</sub>     | 286.3 | 1.9 | 34.4 |
|                 | <b>C1s</b> <sub>-COOMn</sub>  | 288.2 | 2.3 | 26.5 |
|                 | <b>C1s</b> <sub>-COONa</sub>  | 290.2 | 2.7 | 19.0 |

**Supplementary Table 3.** Curve fitting parameters from Co 2p spectra of Co-MOFs

| <b>Samples</b>  | <b>Assignment</b>                                    | <b>E<sub>B</sub> (eV)</b> | <b>FWHM (eV)</b> | <b>At. %</b> |
|-----------------|------------------------------------------------------|---------------------------|------------------|--------------|
| <b>CoBDC</b>    | <b>Co2p<sub>3/2</sub></b> <sub>Co<sup>3+</sup></sub> | 781.1                     | 2.0              | 49.1         |
|                 | <b>Co2p<sub>3/2</sub></b> <sub>Co<sup>2+</sup></sub> | 782.7                     | 2.2              | 50.9         |
|                 | <b>Co2p<sub>3/2</sub></b> <sub>Satellite</sub>       | 785.0                     | 3.2              | -            |
|                 | <b>Co2p<sub>3/2</sub></b> <sub>Satellite</sub>       | 788.2                     | 3.9              | -            |
| <b>UV-CoBDC</b> | <b>Co2p<sub>3/2</sub></b> <sub>Co<sup>3+</sup></sub> | 781.1                     | 2.0              | 48.2         |
|                 | <b>Co2p<sub>3/2</sub></b> <sub>Co<sup>2+</sup></sub> | 782.6                     | 2.2              | 51.8         |
|                 | <b>Co2p<sub>3/2</sub></b> <sub>Satellite</sub>       | 784.8                     | 3.2              | -            |
|                 | <b>Co2p<sub>3/2</sub></b> <sub>Satellite</sub>       | 788.0                     | 3.9              | -            |

|                 |                                           |       |     |      |
|-----------------|-------------------------------------------|-------|-----|------|
| <b>CoBTC</b>    | <b>Co2p<sub>3/2</sub> Co<sub>3+</sub></b> | 781.0 | 2.0 | 48.7 |
|                 | <b>Co2p<sub>3/2</sub> Co<sub>2+</sub></b> | 782.5 | 2.2 | 51.3 |
|                 | <b>Co2p<sub>3/2</sub> Satellite</b>       | 784.6 | 3.4 | -    |
|                 | <b>Co2p<sub>3/2</sub> Satellite</b>       | 787.9 | 4.1 | -    |
| <b>UV-CoBTC</b> | <b>Co2p<sub>3/2</sub> Co<sub>3+</sub></b> | 781.3 | 2.0 | 38.5 |
|                 | <b>Co2p<sub>3/2</sub> Co<sub>2+</sub></b> | 783.3 | 2.2 | 61.5 |
|                 | <b>Co2p<sub>3/2</sub> Satellite</b>       | 785.6 | 3.4 | -    |
|                 | <b>Co2p<sub>3/2</sub> Satellite</b>       | 789.2 | 4.1 | -    |

**Supplementary Table 4.** Curve fitting parameters from C 1s spectra of Co-MOFs

| <b>Samples</b>  | <b>Assignment</b>                      | <b>E<sub>B</sub> (eV)</b> | <b>FWHM (eV)</b> | <b>At. %</b> |
|-----------------|----------------------------------------|---------------------------|------------------|--------------|
| <b>CoBDC</b>    | <b>C1s<sub>C=C,C-H</sub></b>           | 284.7                     | 1.6              | 45.4         |
|                 | <b>C1s<sub>C-O</sub></b>               | 286.2                     | 1.9              | 27.9         |
|                 | <b>C1s<sub>-COOC<sub>o</sub></sub></b> | 288.2                     | 1.9              | 18.5         |
|                 | <b>C1s<sub>-COONa</sub></b>            | 290.2                     | 2.2              | 8.2          |
| <b>UV-CoBDC</b> | <b>C1s<sub>C=C,C-H</sub></b>           | 284.7                     | 1.5              | 50.1         |
|                 | <b>C1s<sub>C-O</sub></b>               | 286.0                     | 1.8              | 28.1         |
|                 | <b>C1s<sub>-COOC<sub>o</sub></sub></b> | 288.4                     | 1.7              | 13.4         |
|                 | <b>C1s<sub>-COONa</sub></b>            | 289.6                     | 2.4              | 8.4          |
| <b>CoBTC</b>    | <b>C1s<sub>C=C,C-H</sub></b>           | 284.7                     | 1.6              | 53.2         |
|                 | <b>C1s<sub>C-O</sub></b>               | 286.1                     | 1.6              | 15.8         |
|                 | <b>C1s<sub>-COOC<sub>o</sub></sub></b> | 288.3                     | 1.9              | 24.3         |

|                 |                                         |       |     |      |
|-----------------|-----------------------------------------|-------|-----|------|
|                 | <b>C1s</b> <sub>-COONa</sub>            | 290.1 | 2.3 | 6.7  |
| <b>UV-CoBTC</b> | <b>C1s</b> <sub>C=C,C-H</sub>           | 284.7 | 1.9 | 13.9 |
|                 | <b>C1s</b> <sub>C-O</sub>               | 286.3 | 2.0 | 19.4 |
|                 | <b>C1s</b> <sub>-COOC<sub>o</sub></sub> | 288.1 | 2.5 | 40.0 |
|                 | <b>C1s</b> <sub>-COONa</sub>            | 290.2 | 2.9 | 26.7 |

**Supplementary Table 5.** Curve fitting parameters from Ni 2p spectra of Ni-MOFs

| <b>Samples</b>  | <b>Assignment</b>                          | <b>E<sub>B</sub> (eV)</b> | <b>FWHM (eV)</b> | <b>At. %</b> |
|-----------------|--------------------------------------------|---------------------------|------------------|--------------|
| <b>NiBDC</b>    | <b>Ni2p<sub>3/2</sub></b> Ni <sup>2+</sup> | 855.7                     | 1.7              | 52.5         |
|                 | <b>Ni2p<sub>3/2</sub></b> Ni <sup>3+</sup> | 856.9                     | 2.8              | 47.5         |
|                 | <b>Ni2p<sub>3/2</sub></b> Satellite        | 861.0                     | 4.0              | -            |
|                 | <b>Ni2p<sub>3/2</sub></b> Satellite        | 863.5                     | 5.0              | -            |
| <b>UV-NiBDC</b> | <b>Ni2p<sub>3/2</sub></b> Ni <sup>2+</sup> | 855.7                     | 1.7              | 52.8         |
|                 | <b>Ni2p<sub>3/2</sub></b> Ni <sup>3+</sup> | 856.9                     | 2.8              | 47.2         |
|                 | <b>Ni2p<sub>3/2</sub></b> Satellite        | 861.0                     | 4.0              | -            |
|                 | <b>Ni2p<sub>3/2</sub></b> Satellite        | 864.4                     | 5.0              | -            |
| <b>NiBTC</b>    | <b>Ni2p<sub>3/2</sub></b> Ni <sup>2+</sup> | 855.7                     | 1.7              | 52.1         |
|                 | <b>Ni2p<sub>3/2</sub></b> Ni <sup>3+</sup> | 856.9                     | 2.8              | 47.9         |
|                 | <b>Ni2p<sub>3/2</sub></b> Satellite        | 861.1                     | 4.2              | -            |
|                 | <b>Ni2p<sub>3/2</sub></b> Satellite        | 864.3                     | 5.5              | -            |
| <b>UV-NiBTC</b> | <b>Ni2p<sub>3/2</sub></b> Ni <sup>2+</sup> | 853.2                     | 1.5              | 4.1          |
|                 | <b>Ni2p<sub>3/2</sub></b> Ni <sup>3+</sup> | 856.1                     | 2.3              | 95.9         |

|  |                                     |       |     |   |
|--|-------------------------------------|-------|-----|---|
|  | <b>Ni2p<sub>3/2</sub></b> Satellite | 860.4 | 4.5 | - |
|  | <b>Ni2p<sub>3/2</sub></b> Satellite | 863.9 | 5.2 | - |

**Supplementary Table 6.** Curve fitting parameters from C 1s spectra of Ni-MOFs

| <b>Samples</b>  | <b>Assignment</b>  | <b>E<sub>B</sub> (eV)</b> | <b>FWHM (eV)</b> | <b>At. %</b> |
|-----------------|--------------------|---------------------------|------------------|--------------|
| <b>NiBDC</b>    | <b>C1s</b> C=C,C-H | 284.7                     | 1.4              | 74.9         |
|                 | <b>C1s</b> C-O     | 286.1                     | 1.7              | 11.5         |
|                 | <b>C1s</b> -COONi  | 288.3                     | 1.3              | 11.3         |
|                 | <b>C1s</b> -COONa  | 290.3                     | 1.9              | 2.3          |
| <b>UV-NiBDC</b> | <b>C1s</b> C=C,C-H | 284.7                     | 1.4              | 68.8         |
|                 | <b>C1s</b> C-O     | 285.9                     | 1.5              | 12.6         |
|                 | <b>C1s</b> -COONi  | 288.4                     | 1.4              | 16.1         |
|                 | <b>C1s</b> -COONa  | 290.2                     | 2.0              | 2.5          |
| <b>NiBTC</b>    | <b>C1s</b> C=C,C-H | 284.7                     | 1.4              | 66.3         |
|                 | <b>C1s</b> C-O     | 286.2                     | 1.4              | 7.5          |
|                 | <b>C1s</b> -COONi  | 288.3                     | 1.4              | 23.2         |
|                 | <b>C1s</b> -COONa  | 290.3                     | 1.8              | 3.0          |
| <b>UV-NiBTC</b> | <b>C1s</b> C=C,C-H | 284.7                     | 1.6              | 12.2         |
|                 | <b>C1s</b> C-O     | 286.3                     | 1.8              | 54.0         |
|                 | <b>C1s</b> -COONi  | 288.3                     | 1.9              | 14.6         |
|                 | <b>C1s</b> -COONa  | 290.0                     | 1.9              | 19.2         |
